1 Path tortuosity changes the transport cost paradigm in terrestrial animals

2 Short title: Track tortuosity and minimum cost of transport speed

3

4 R. P. Wilson<sup>1\*</sup>, K. A. R. Rose<sup>1\*</sup>, R. S. Metcalfe<sup>2</sup>, M. D. Holton<sup>3</sup>, J. Redcliffe<sup>1</sup>, R. Gunner<sup>1</sup>, L.

5 Börger<sup>1</sup>, A. Loison<sup>4</sup>, J. Miloš<sup>5</sup>, M. S. Painter<sup>5</sup>, V. Silovský<sup>5</sup>, N. Marks<sup>6</sup>, M. Garel<sup>7</sup>, C. Toigo<sup>7</sup>,

6 P. Marchand<sup>7</sup>, N. C. Bennett<sup>8</sup>, M. A. McNarry<sup>2</sup>, K. A. Mackintosh<sup>2</sup>, M. R. Brown<sup>9</sup>, D. M.

7 Scantlebury<sup>6</sup>.

8

9

10 <sup>1</sup>Swansea Lab for Animal Movement, Biosciences, College of Science, Swansea University,  
11 Singleton Park, Swansea

12

13 <sup>2</sup>Applied Sports, Technology, Exercise and Medicine (A-STEM) Research Centre, College of  
14 Engineering, Swansea University, Bay Campus, Swansea

15

16 <sup>3</sup>College of Science, Swansea University, Fabian Way, Swansea

17

18 <sup>4</sup>LECA - CNRS, University Savoie, 73370 Le Bourget du Lac, France

19

20 <sup>5</sup>Department of Game Management and Wildlife Biology, Faculty of Forestry and Wood  
21 Sciences, Czech University of Life Sciences, Prague 165 00, Czech Republic

22

23 <sup>6</sup>School of Biological Sciences, Queen's University Belfast, Belfast

24

25 <sup>7</sup>Office National de la Chasse et de la Faune Sauvage, Unité Ongulés Sauvages, 38610 Gières,  
26 France

27

28 <sup>8</sup>Mammal Research Institute, Department of Zoology and Entomology, University of Pretoria,  
29 Pretoria, South Africa

30

31 <sup>9</sup>417 EN College of Engineering, Bay Campus, Swansea University, Fabian Way, Swansea

32

33 \*Corresponding authors

34 Emails: [R.P.Wilson@swansea.ac.uk](mailto:R.P.Wilson@swansea.ac.uk) and [K.A.R.Rose@swansea.ac.uk](mailto:K.A.R.Rose@swansea.ac.uk),

35

36

37

38

39

40

## 1 Abstract

2  
3 Animal movement paths are variously tortuous, with high turn rates predicted to be  
4 energetically costly, especially at high speeds. Animals travel most efficiently at the speed that  
5 gives the lowest cost of transport (COT), a well-defined point for movement in fluid media.  
6 However, theoretically, land animals should travel at their maximum speed to minimize COT,  
7 which they do not, instead travelling at walking pace. We measured oxygen consumption in  
8 humans to demonstrate that the energetic costs of turning increase disproportionately with both  
9 speed and angular velocity. This resulted in the minimum COT speed occurring at very low  
10 speeds, which reduced with increased path tortuosity. Data on turn rates from six free-ranging  
11 terrestrial species underpinned this because all individuals turned faster at the slowest speeds  
12 across the full speed range. The optimum movement speed for minimum COT in land animals  
13 thus depends on the environment and behavior since both affect track tortuosity.

## 14 Introduction

15  
16 Reaction to stimuli by movement is a fundamental tenet of the animal kingdom, with  
17 appropriate responses enhancing survival and lifetime reproductive success [1]. Movement  
18 requires energy, which varies according to the speed of the animal [2]. The speed that an animal  
19 selects for movement, and therefore the energy designated to it over time, depends on the  
20 purpose of the movement [3]. There are three primary reasons for this: (i) animals may move  
21 at any speed, including their maximum, to evade predators or capture prey [4], to maximize  
22 net rate of acquisition of food energy [5], or to provide young with food at an appropriate rate  
23 for their growth [6]. (ii) animals may move at a speed that minimizes power costs (a concept  
24 that is primarily applicable for flying animals) [7]. In addition, (iii) animals may move at a  
25 speed that minimizes the cost of transport ( $COT_{min}$ ), maximizing the distance travelled per unit  
26 of energy [8, 9]. This last paradigm [10] is particularly important because most travel is  
27 assumed to be under strong selection pressure for animals to maximize output while  
28 minimizing input, which occurs at  $COT_{min}$  [e.g. 11, 12].  $COT_{min}$  is well defined for any instance  
29 where power for movement increases with speed at a greater than linear rate, such as in aquatic  
30 and volant animals. Indeed, wild animals in fluid media generally travel at these speeds [13].  
31 However, beyond basal metabolic rate [14], most terrestrial animals have a linear relationship  
32 between power and speed [10, 15] and therefore, because COT is derived by dividing the power  
33 by the speed, COT in these animals will always decrease with increasing speed. In short, the  
34 lowest theoretical costs of transport in terrestrial animals should occur at their maximum speeds  
35 (but see [16, 17]). Yet these are not the speeds at which animals normally travel in natural  
36 contexts [18]. Although the probability of accident and injury increases at very high speeds  
37 (e.g. [19]), which is a clear reason to avoid them unless there is a compelling motive to sprint  
38 (e.g. in cursorial predators and their prey [20]), there is currently no energy-based explanation  
39 as to why land animals travel through their environments at their normal chosen speeds.

40 Based on recent studies that found that the costs associated with turning are substantial  
41 [21, 22], we hypothesized that track tortuosity should therefore alter the speed of  $COT_{min}$  in  
42 terrestrial animals. To test this, we set up experiments to gain empirical data on how speed and  
43 angular velocity in humans relate to energy expenditure and thereby to the cost of transport. At  
44 the same time, we equipped 6 species of free-living animal with tags that allowed us to study  
45 animal speed in tandem with angular velocity to see whether our physiological findings  
46 translated into patterns of movement in the natural environment.

47  
48  
49

## 1 Results

2

### 3 Empirical data from humans show how increasing track tortuosity reduces the minimum 4 cost of transport speed to a slow walk

5

6 We examined the energetics of moving in humans by measuring oxygen consumption in 20  
7 subjects walking defined trajectories consisting of varying angles between straight-line  
8 sections at defined speeds. We noted how power increased disproportionately with increasing  
9 angular velocity, which resulted in clear cost of transport minima that did not occur at the  
10 higher walking speeds. Rather, minimum costs of transport occurred at lower walking speeds  
11 when angular velocities were high.

12 Our calculations of power-use by participants walking variously angled courses showed  
13 a significant interaction effect between walking speed and turn angle on total mass-specific  
14 metabolic power (speed<sup>2</sup> x angle category,  $F = 101.81$ ,  $P < 0.001$ ), with the rate of increase in  
15 power for a given increase in travel speed increasing disproportionately with turn angle (Fig  
16 1a, Table 1). Consequently, there was a significant interaction between walking speed and turn  
17 angle on the total mass-specific cost of transport (speed<sup>2</sup> x angle category,  $F = 59.13$ ,  $P < 0.001$ )  
18 (Fig. 1b, Table 1). The cost of transport curve showed distinct minima for paths incorporating  
19 turns, becoming more U-shaped, and with  $COT_{min}$  shifting to progressively lower walking  
20 speeds with increasing turn angle (Fig 1b).

21 Similarly, significant interaction terms were found for the quadratic relationships  
22 between speed and turn cost ( $J\ kg^{-1}$ , speed<sup>2</sup> x angle category,  $F = 37.98$ ,  $P < 0.001$ ) and turn  
23 power ( $W\ kg^{-1}$ , speed<sup>2</sup> x angle category,  $F = 66.87$ ,  $P < 0.001$ ) (Table 1), with the rate of increase  
24 with speed becoming greater as angle increased (Fig 2).

**Table 1. Summary of the outputs of linear mixed-effects models conducted to investigate the effects of speed and angle on angular velocity or metabolic parameters and the effects of speed and angular velocity on metabolic parameters.**

| Parameter                                       | Term                                           | F        | DF     | P      | R <sup>2</sup> Fixed factors | R <sup>2</sup> total model | Coefficients                                                                                                                                                                                                                                                                                                                                                                                                         |
|-------------------------------------------------|------------------------------------------------|----------|--------|--------|------------------------------|----------------------------|----------------------------------------------------------------------------------------------------------------------------------------------------------------------------------------------------------------------------------------------------------------------------------------------------------------------------------------------------------------------------------------------------------------------|
| Angular velocity (° s <sup>-1</sup> )           | U                                              | 1037.87  | 1, 289 | <0.001 | 0.979                        | 0.983                      | 0°: = 0U + 0<br>90°: = 31.94U + 28.07<br>135°: = 46.60U + 43.28<br>180°: = 73.5 U + 43.92                                                                                                                                                                                                                                                                                                                            |
|                                                 | angle [as factor]                              | 5365.33  | 3, 289 | <0.001 |                              |                            |                                                                                                                                                                                                                                                                                                                                                                                                                      |
|                                                 | U: angle [as factor]                           | 170.86   | 3, 289 | <0.001 |                              |                            |                                                                                                                                                                                                                                                                                                                                                                                                                      |
| Angular velocity (° s <sup>-1</sup> )           | angle                                          | 16001.97 | 1, 289 | <0.001 | 0.979                        | 0.982                      | 0.69 m s <sup>-1</sup> : = 0.54(angle) + 0.89<br>0.97 m s <sup>-1</sup> : = 0.64(angle) + 0.38<br>1.25 m s <sup>-1</sup> : = 0.74(angle) + 0.86<br>1.53 m s <sup>-1</sup> : = 0.88(angle) - 1.10                                                                                                                                                                                                                     |
|                                                 | U [as factor]                                  | 345.09   | 3, 289 | <0.001 |                              |                            |                                                                                                                                                                                                                                                                                                                                                                                                                      |
|                                                 | angle: U [as factor]                           | 168.49   | 3, 289 | <0.001 |                              |                            |                                                                                                                                                                                                                                                                                                                                                                                                                      |
| Total P <sub>met</sub> (W kg <sup>-1</sup> )    | U                                              | 9.37     | 1, 284 | 0.002  | 0.769                        | 0.919                      | 0°: = 1.99(speed) <sup>2</sup> - 2.39(speed) + 3.80<br>90°: = 2.48(speed) <sup>2</sup> - 2.39(speed) + 3.59<br>135°: = 2.97(speed) <sup>2</sup> - 2.39(speed) + 3.53<br>180°: = 3.87(speed) <sup>2</sup> - 2.39(speed) + 3.13                                                                                                                                                                                        |
|                                                 | U <sup>2</sup>                                 | 65.29    | 1, 284 | <0.001 |                              |                            |                                                                                                                                                                                                                                                                                                                                                                                                                      |
|                                                 | angle [as factor]                              | 201.83   | 3, 284 | <0.001 |                              |                            |                                                                                                                                                                                                                                                                                                                                                                                                                      |
|                                                 | U <sup>2</sup> : angle [as factor]             | 101.81   | 3, 284 | <0.001 |                              |                            |                                                                                                                                                                                                                                                                                                                                                                                                                      |
| Total CoT (J kg <sup>-1</sup> m <sup>-1</sup> ) | U                                              | 137.17   | 1, 284 | <0.001 | 0.471                        | 0.860                      | 0°: = 2.38(speed) <sup>2</sup> - 6.71(speed) + 7.83<br>90°: = 2.66(speed) <sup>2</sup> - 6.71(speed) + 7.80<br>135°: = 2.90(speed) <sup>2</sup> - 6.71(speed) + 7.97<br>180°: = 3.43(speed) <sup>2</sup> - 6.71(speed) + 7.86                                                                                                                                                                                        |
|                                                 | U <sup>2</sup>                                 | 122.52   | 1, 284 | <0.001 |                              |                            |                                                                                                                                                                                                                                                                                                                                                                                                                      |
|                                                 | angle [as factor]                              | 234.82   | 3, 284 | <0.001 |                              |                            |                                                                                                                                                                                                                                                                                                                                                                                                                      |
|                                                 | U <sup>2</sup> : angle [as factor]             | 59.13    | 3, 284 | <0.001 |                              |                            |                                                                                                                                                                                                                                                                                                                                                                                                                      |
| Turn cost (J kg <sup>-1</sup> )                 | U                                              | 1.58     | 1, 203 | 0.209  | 0.658                        | 0.770                      | 90°: = 3.46(speed) <sup>2</sup> - 4.66(speed) + 2.29<br>135°: = 4.70(speed) <sup>2</sup> - 4.66(speed) + 2.99<br>180°: = 7.34(speed) <sup>2</sup> - 4.66(speed) + 2.56                                                                                                                                                                                                                                               |
|                                                 | U <sup>2</sup>                                 | 9.73     | 1, 203 | 0.002  |                              |                            |                                                                                                                                                                                                                                                                                                                                                                                                                      |
|                                                 | angle [as factor]                              | 147.09   | 2, 203 | <0.001 |                              |                            |                                                                                                                                                                                                                                                                                                                                                                                                                      |
|                                                 | U <sup>2</sup> : angle [as factor]             | 37.98    | 2, 203 | <0.001 |                              |                            |                                                                                                                                                                                                                                                                                                                                                                                                                      |
| Turn P <sub>met</sub> (W kg <sup>-1</sup> )     | U                                              | 7.77     | 1, 203 | 0.006  | 0.739                        | 0.814                      | 90°: = 4.73(speed) <sup>2</sup> - 7.79(speed) + 3.62<br>135°: = 6.00(speed) <sup>2</sup> - 7.79(speed) + 3.71<br>180°: = 8.62(speed) <sup>2</sup> - 7.79(speed) + 2.64                                                                                                                                                                                                                                               |
|                                                 | U <sup>2</sup>                                 | 26.60    | 1, 203 | <0.001 |                              |                            |                                                                                                                                                                                                                                                                                                                                                                                                                      |
|                                                 | angle [as factor]                              | 154.09   | 2, 203 | <0.001 |                              |                            |                                                                                                                                                                                                                                                                                                                                                                                                                      |
|                                                 | U <sup>2</sup> : angle [as factor]             | 66.87    | 2, 203 | <0.001 |                              |                            |                                                                                                                                                                                                                                                                                                                                                                                                                      |
| Turn cost (J kg <sup>-1</sup> )                 | Angular velocity                               | 1.87     | 1, 284 | 0.285  | 0.711                        | 0.770                      | 0.69 m s <sup>-1</sup> : 0.0002(angular velocity) <sup>2</sup> + 0.0079(angular velocity) - 0.0686<br>0.97 m s <sup>-1</sup> : 0.0003(angular velocity) <sup>2</sup> + 0.0079(angular velocity) - 0.2339<br>1.25 m s <sup>-1</sup> : 0.0004(angular velocity) <sup>2</sup> + 0.0079(angular velocity) - 0.1453<br>1.53 m s <sup>-1</sup> : 0.0004(angular velocity) <sup>2</sup> + 0.0079(angular velocity) - 0.2471 |
|                                                 | Angle [as factor] <sup>2</sup>                 | 13.67    | 1, 282 | <0.001 |                              |                            |                                                                                                                                                                                                                                                                                                                                                                                                                      |
|                                                 | U [as factor]                                  | 5.66     | 2, 280 | <0.001 |                              |                            |                                                                                                                                                                                                                                                                                                                                                                                                                      |
|                                                 | Angle [as factor] <sup>2</sup> : U [as factor] | 3.49     | 2, 280 | 0.016  |                              |                            |                                                                                                                                                                                                                                                                                                                                                                                                                      |
|                                                 | U [as factor]                                  |          |        |        |                              |                            |                                                                                                                                                                                                                                                                                                                                                                                                                      |
| Turn P <sub>met</sub> (W kg <sup>-1</sup> )     | Angular velocity                               | 0.80     | 1, 204 | 0.371  | 0.734                        | 0.817                      | 0.69 m s <sup>-1</sup> : 0.0002(angular velocity) <sup>2</sup> + 0.0018(angular velocity) - 0.0334<br>0.97 m s <sup>-1</sup> : 0.0002(angular velocity) <sup>2</sup> + 0.0018(angular velocity) - 0.1211<br>1.25 m s <sup>-1</sup> : 0.0003(angular velocity) <sup>2</sup> + 0.0018(angular velocity) - 0.0595<br>1.53 m s <sup>-1</sup> : 0.0004(angular velocity) <sup>2</sup> + 0.0018(angular velocity) - 0.1199 |
|                                                 | Angle [as factor] <sup>2</sup>                 | 46.83    | 1, 204 | <0.001 |                              |                            |                                                                                                                                                                                                                                                                                                                                                                                                                      |
|                                                 | U [as factor]                                  | 21.46    | 3, 204 | <0.001 |                              |                            |                                                                                                                                                                                                                                                                                                                                                                                                                      |
|                                                 | Angle [as factor] <sup>2</sup> : U [as factor] | 3.75     | 3, 204 | 0.011  |                              |                            |                                                                                                                                                                                                                                                                                                                                                                                                                      |
|                                                 | U [as factor]                                  |          |        |        |                              |                            |                                                                                                                                                                                                                                                                                                                                                                                                                      |

## 1 **Wild animal data support the idea that normal travel speed varies with angular velocity**

2  
3 We fitted five wild mammal species (African lions *Panthera leo*, chamois *Capra rubicapra*,  
4 ibex *Capra ibex*, mouflon *Ovis orientalis*, wild boar *Sus scrofa*) and one domestic animal (the  
5 goat *Capra aegagrus*) allowed to range freely, with devices that enabled us to record speed (or  
6 a proxy for it) and angular velocity. All individuals tended to travel relatively slowly, but they  
7 predominantly engaged in the highest angular velocities at the lowest speeds (using dynamic  
8 body acceleration as a proxy for speed [23]) decreasing angular velocities in their turns as their  
9 travel speeds increased (Fig 3). The incidence of turning behavior was apparent in examples of  
10 the free-living animal movement data when resolved at sub-second level, which showed  
11 intensive and extensive turning behavior, even when movement paths appeared directed at  
12 larger scales (e.g. Fig 4).

## 14 **Discussion**

15  
16 There have been extensive studies of the relationship between terrestrial animal speed and  
17 power, the vast majority of which have been conducted on a treadmill to show that power  
18 increases linearly with speed [10]. While fundamental, this highly controlled scenario does not  
19 echo the situation found in nature where variability in, for example, topography and surface  
20 penetrability will also affect power to travel [24] and thereby the cost of transport. Interestingly,  
21 in a recent study of how scaling affects costs in animals moving on inclines, Halsey and White  
22 [25] present data that show clear minima in costs of transport with slope (although the effect  
23 of speed is not detailed). This, therefore, already points to an important effect of how the  
24 environment is expected to structure selection of animal speed for energetically optimum  
25 movement. But animals turn frequently, as our Figure 4 shows, and presumably much more  
26 than they encounter varying inclines. Previous works have indicated that turns are energetically  
27 costly [21, 22] but, due to their experimental protocol, these could not have defined how the  
28 costs of transport relate to angular velocity and speed, nor that angular velocity could have  
29 created clear minima in costs of transport at such low speeds. The extraordinary magnitude of  
30 the increase in power costs with increasing angular velocity and speed is, in part, explained by  
31 animals having to develop forces to counteract the centripetal force incurred in the turn, given  
32 by;  $F = m.v^2/r$ , where  $m$  is the mass,  $v$ , the velocity and  $r$  the radius of the turn. Thus, some of  
33 the energy used for turning has to be used in developing lateral forces. However, acute turns  
34 will also require some forces opposing the drive force, being manifest as deceleration followed  
35 by corrective acceleration for straight-line travel after a turn. This will occur even at low  
36 speeds, which explains the sharp drop off in angular velocity in turns, even at low speeds in  
37 our wild animals (Fig 3) and the minimum cost of transport occurring at such low walking  
38 speeds of humans during 180° turns (Fig 1).

39 The high power associated with turns translates into well-defined minima in the costs  
40 of transport for defined speeds and angular velocities (Fig 2b). This means that an overall  
41 optimum speed for a wild animal, moving to minimize transport costs, will depend on the  
42 frequency and extent of turns. These will depend on a large number of turn elicitors that confer  
43 benefit to the animal if it turns. These will range from barriers, including localized ones such  
44 as trees/shrubs (e.g. [18]), or navigating through differential energy landscapes [24], through  
45 to acquisition strategies for food, such as area-restricted search [26], or mates [27]. Indeed, we  
46 suggest that the incidence of turning behavior in wild animals has been underestimated, not  
47 least because we have little capacity to resolve it at the scale necessary to be energetically  
48 meaningful, even using GPS technology [28]. A notable exception is with inertial/dead-

49 reckoned data (e.g. [29]), which show that animal paths can consist of extensive and intensive  
50 turning behavior (e.g. Fig 4).

51 Variation in the environment or in animal behavior would also lead us to expect animals  
52 to vary travel speed accordingly, even intra-specifically, reflecting different motivations for  
53 speed selection [3], which is consistent with the animal data we present here (Fig 3). Clearly,  
54 although such data may not always agree with animals actually using  $COT_{min}$  for a number of  
55 reasons [3], the interplay of speed and angular velocity, and the huge effect that they have on  
56 movement energetics, points to the importance of both in modulating trajectories according to  
57 function. Indeed, future treatises that attempt to link this with the multiple other factors that  
58 affect the energy costs of travel (the energy landscape [24] may find that we can explain animal  
59 speed- and turn velocity-selection much more satisfactorily than we can at present.

60 Our treatment is simplistic for a number of reasons. Not least, we only consider power  
61 and COT metrics as bi-dimensional when they will be affected by multiple properties of the  
62 environment that modulate power use, such as slope and surface penetrability [24]. This will  
63 be further complicated by gait changes [30-34]. This work nevertheless demonstrates the  
64 profound effect that turns have on cost of transport for terrestrial animals using humans as a  
65 model, although we expect the principle to be the same for flying and aquatic animals. If we  
66 are to progress with models purporting to help us understand animal trajectories from an  
67 energetic, and ultimately behavioral, perspective though, we will have to accept that small  
68 things, such as acute corners can sometimes make big differences in understanding the details  
69 and elicitors of movement trajectories [35].

70

## 71 **Materials and Methods**

72

73

74 **Participants.** Twenty able-bodied male participants (mean  $\pm$  SD: age  $30 \pm 8$  years; body mass  
75  $75.6 \pm 11.2$  kg; stature  $1.78 \pm 0.06$  m; body mass index:  $24.0 \pm 3.2$  kg·m<sup>-2</sup>) gave their written  
76 informed consent to volunteer for this study. Ethical approval was granted by the Swansea  
77 University ethics committee. Stature (Holtain, Crymych, UK) was measured to the nearest 0.01  
78 m and body mass (Seca, Germany) to the nearest 0.01 kg.

79

80 **Trials.** Participants walked at four different speeds (0.69, 0.97, 1.25 and 1.53 m s<sup>-1</sup>) and four  
81 turn angle extents (0, 90, 135 and 180°), giving a total of sixteen speed and angle combinations.  
82 Separate walking tracks were marked onto a flat-surfaced sports lab floor using tape for each  
83 angle of interest. Each track alternated between 5 m straight lines and turns with equal numbers  
84 of left and right turns (0°: a 25 m straight line with markers every 5 m; 90°: two squares sharing  
85 one 5 m straight; 135°: two eight-angled star polygons sharing a 5 m straight; 180°: a 5 m  
86 straight). Participants' average walking speed was controlled using a metronome at either 8,  
87 12, 15 or 18 bpm. Participants walked barefooted, carried out only step-turns (not spin-turns),  
88 and reached a corner (or 5 m mark) on each metronome beat (i.e. travelled 5 m between beats).  
89 Walking conditions were block-randomized by turning angle: all speed trials for a given angle  
90 were conducted before moving on to the next angle, but average travel speed and the sequence  
91 in which the angle conditions were completed by each participant were randomized and  
92 counterbalanced. Each walking condition lasted 3 minutes to allow achievement of a metabolic  
93 steady state, and each condition was separated with 3-minutes of quiet seated rest.

94

95 **Respirometry.** A portable and wireless breath-by-breath respirometry system (MetaMax 3B,  
96 Cortex, Biophysik, Leipzig, Germany) was used to measure rates of oxygen consumption ( $VO_2$ ,  
97 L·min<sup>-1</sup>·kg<sup>-1</sup>) and carbon dioxide production ( $VCO_2$ , L·min<sup>-1</sup>·kg<sup>-1</sup>). Prior to each trial, reference  
98 gases were used to calibrate the O<sub>2</sub> and CO<sub>2</sub> analysers and the turbine volume transducer was

99 calibrated using a 3 L syringe (Hans Rudolph, Kansas City, MO). Respiratory exchange ratios  
100 ( $VCO_2:VO_2$ ) and their thermal equivalents taken from (36) were used to convert  $VO_2$  to  
101 metabolic power ( $\overline{P_{met}}$ ,  $W \cdot kg^{-1}$ ). The cost of transport ( $J \cdot kg^{-1} \cdot m^{-1}$ ) was calculated by dividing  
102  $\overline{P_{met}}$  by average travel speed ( $m \cdot s^{-1}$ ).

103  
104 **Identifying angular velocity from turns.** All participants were equipped with a lower back,  
105 mid-line mounted ‘Daily Diary’ tag (37) recording tri-axial (orthogonal) acceleration and  
106 magnetic field intensity at 40 Hz. Post-experiment, all magnetic field data were plotted on a  
107 tri-axial spherical plot of magnetic field intensity (m-sphere; see (38) for details). While  
108 participants walking in straight-lines led to little variation in tri-axial plotted position on the m-  
109 sphere, those that executed turns resulted in rapid movement of points across the m-sphere  
110 surface which clearly showed at which points turns began and ended so that turn duration could  
111 be derived. Maximum resolution for this was  $1/40^{th}$  second. The duration of turns was  
112 determined for 5 turns per individual per speed and turn angle combination.

113  
114 **Derivation of costs.** Metabolic measurements for the  $0^\circ$  trials were corrected for the costs of  
115  $180^\circ$  turns that were necessary at the end of every 25 m of straight-line walking. In order to  
116 calculate the cost of transport for straight line walking, a series of calculations were undertaken.  
117 Firstly, the time taken  $t$ , to travel one length (either 5 m or 25 m) and execute one turn for any  
118 given track was calculated as distance travelled divided by speed,  $\frac{d}{v}$ . The total mass-specific  
119 cost of walking one length and executing one turn was then calculated as the time taken  $\times P_{met}$   
120  $(tP_{met})$ . The total mass-specific cost of walking in a straight line for 20 m was then calculated  
121 by subtracting the mass-specific cost of walking 5 m + 1 turn in  $180^\circ$  trials from 25 m + 1 turn  
122 in the  $0^\circ$  trials;  $\overline{t_{CoW}} = tP_{met}|_{d=25} - tP_{met}|_{d=5}$ . The total mass-specific cost of walking in a straight  
123 line for 20 m was then divided by 20 in order to derive the total mass-specific cost of transport  
124 ( $J \cdot kg^{-1} \cdot m^{-1}$ ). Turn costs for any given speed and angle combination were calculated by  
125 subtracting  $\frac{5}{20} \times$  the cost of transport for straight-line walking from the total mass-specific cost  
126 of walking 5 m and executing one turn. Each participant’s turn costs were divided by their  
127 mean turn durations in order to calculate turn power ( $W \cdot kg^{-1}$ ).

128  
129 **Animal tagging.** Five wild mammal species (African lions *Panthera leo*, chamois *Rupicapra*  
130 *rupicapra*, ibex *Capra ibex*, mouflon *Ovis orientalis* and wild boar *Sus scrofa*) and one  
131 domestic mammal (domestic goat *Capra aegagrus*), which was allowed to range freely, were  
132 fitted with collar-mounted GPS-enabled ‘Daily Diary’ tags (2) recording tri-axial magnetic  
133 field intensity and tri-axial acceleration at 10-40 Hz (see species-specific details in table 1).  
134 Tags were left in place for between 15 and >250 days before being retrieved. Downloaded data  
135 were treated to determine movement patterns using dead-reckoning as described in (29),  
136 correcting for drift using the periodic GPS positions (29). From these data, a random period  
137 (24-50h) was isolated from each individual, with some variation in durations to ensure that  
138 appreciable movement had taken place. For these periods, the vectorial dynamic body  
139 acceleration (VeDBA), a good proxy for speed (23, 39), was calculated according to (40) as  
140 well as the angular velocity over one second at approximately 10 s intervals so as to give ca.  
141 20,000 angular velocity-VeDBA pairs per individual. Data from five individuals for all species  
142 were used in this manner except for the mouflon, where only 4 animals were used.

143

144  
145  
146  
147

**Table 2. Details of tag deployments on free living animals**

| Species                    | No. | Study area               | Tag weight (g) | Tag weight as % body weight | Deployment period     | Deployment length (days) | Ethical permissions                                                                                            |
|----------------------------|-----|--------------------------|----------------|-----------------------------|-----------------------|--------------------------|----------------------------------------------------------------------------------------------------------------|
| <i>Panthera leo</i>        | 5   | Kalahari, S. Africa      | 1240-1330      | <2                          | Feb-19                | 18-21                    | Queen's University Belfast (QUB-BS-AREC-18-006), Pretoria University (NAS061-19), South African Parks (011-18) |
| <i>Rupicapra rupicapra</i> | 5   | Les Bauges, France       | 450            | 1.13                        | June 2017-May 2018    | >250 days                | IP 1516-14                                                                                                     |
| <i>Capra ibex</i>          | 5   | Belledonne, France       | 450            | 0.64                        | April 2017-March 2018 | >250 days                | IP 1516-14                                                                                                     |
| <i>Ovis gmelini</i>        | 4   | Caroux-Espinouse, France | 450            | 0.90                        | May 2017-April 2018   | >250 days                | IP 1516-14                                                                                                     |
| <i>Sus scrofa</i>          | 5   | Kostelec, Czech republic | 850            | 0.8-1.3                     | May - Oct 2019        | 30-120                   | Ministry of environment CZ (MZP/2019/630/361)                                                                  |
| <i>Capra aegagrus</i>      | 5   | Les Bauges, France       | 510            | 1.28                        | August-September 2017 | 29 days                  | SU-Ethics-Student-190717/246                                                                                   |
| <i>Homo sapiens</i>        | 20  | Swansea, UK              | <1             | <1                          | July-November 2019    | < 1 day                  | Swansea University CoE ethics: 2012:075                                                                        |



**Statistical analyses.** Linear mixed-effects models (lme4 package in R Studio v 1.2.1335) were conducted in order to investigate the relationship between angular velocity and average travel speed with differing angle extent; angular velocity with angle extent at different speeds, mass-specific metabolic parameters and speed with different angle extent; and mass-specific metabolic parameters with angular velocity at different speeds or angle extent. Participant identity was included in the models as a random factor. The F statistic and marginal and conditional  $R^2$  were determined using the ‘car (3.0-5)’ and ‘MuMIn (1.43.6)’ packages, respectively.

## Acknowledgements

RPW conceived the overall study while KAR, RSM developed and executed the human-based work with support from MAM and KAM. DMS, NM, NCB, and RPW conceived specific ideas for the lion work and JR, RG, LB, AL, JM, MSP, VS, MG, CT, PM conceived methodologies and implemented various aspects of the fieldwork for the other species. DMS, NM and NCB acquired funding and support. KAR, RSM, JR, RG and RPW performed the analyses while MDH developed and provided software and analytical ideas. All authors contributed to the manuscript preparation.

## References

1. Williams BK, Nichols JD, Conroy MJ. Analysis and management of animal populations: Academic Press; 2002.
2. Dickinson MH, Farley CT, Full RJ, Koehl M, Kram R, Lehman S. How animals move: an integrative view. *Science*. 2000;288(5463):100-6.
3. Wilson RS, Husak JF, Halsey LG, Clemente CJ. Predicting the movement speeds of animals in natural environments. *Integrative and comparative biology*. 2015;55(6):1125-41.
4. Williams TM, Wolfe L, Davis T, Kendall T, Richter B, Wang Y, et al. Instantaneous energetics of puma kills reveal advantage of felid sneak attacks. *Science*. 2014;346(6205):81-5.
5. Wilson RP, Ropert-Coudert Y, Kato A. Rush and grab strategies in foraging marine endotherms: the case for haste in penguins. *Animal Behaviour*. 2002;63(1):85-95.
6. Shepard EL, Wilson RP, Quintana F, Laich AG, Forman DW. Pushed for time or saving on fuel: fine-scale energy budgets shed light on currencies in a diving bird. *Proceedings of the Royal Society of London B: Biological Sciences*. 2009:rsph20090683.
7. Tucker VA. Bird metabolism during flight: evaluation of a theory. *Journal of Experimental Biology*. 1973;58(3):689-709.
8. Watanabe YY, Sato K, Watanuki Y, Takahashi A, Mitani Y, Amano M, et al. Scaling of swim speed in breath-hold divers. *J Anim Ecol*. 2011;80(1):57-68. doi: 10.1111/j.1365-2656.2010.01760.x. PubMed PMID: WOS:000285110600006.
9. Tucker VA. Energetic cost of locomotion in animals. *Comparative Biochemistry and Physiology*. 1970;34(4):841-6.

10. Taylor CR, Schmidtn.K, Raab JL. Scaling of Energetic Cost of Running to Body Size in Mammals. *Am J Physiol.* 1970;219(4):1104-&. PubMed PMID: WOS:A1970H466000046.
11. Langman VA, Rowe MF, Roberts TJ, Langman NV, Taylor CR. Minimum cost of transport in Asian elephants: do we really need a bigger elephant? *The Journal of experimental biology.* 2012;215(9):1509-14.
12. van der Hoop JM, Fahlman A, Hurst T, Rocho-Levine J, Shorter KA, Petrov V, et al. Bottlenose dolphins modify behavior to reduce metabolic effect of tag attachment. *The Journal of experimental biology.* 2014;217(23):4229-36.
13. Pennycuick CJ, Akesson S, Hedenstrom A. Air speeds of migrating birds observed by ornithodolite and compared with predictions from flight theory. *J R Soc Interface.* 2013;10(86). doi: ARTN 20130419  
10.1098/rsif.2013.0419. PubMed PMID: WOS:000321614300010.
14. White CR, Seymour RS. Mammalian basal metabolic rate is proportional to body mass<sup>2/3</sup>. *Proc Natl Acad Sci U S A.* 2003;100(7):4046-9. Epub 2003/03/15. doi: 10.1073/pnas.0436428100. PubMed PMID: 12637681; PubMed Central PMCID: PMCPMC153045.
15. Taylor CR, Heglund NC, Maloiy GMO. Energetics and Mechanics of Terrestrial Locomotion .1. Metabolic Energy-Consumption as a Function of Speed and Body Size in Birds and Mammals. *J Exp Biol.* 1982;97(Apr):1-21. PubMed PMID: WOS:A1982NP45000001.
16. Daley MA, Channon AJ, Nolan GS, Hall J. Preferred gait and walk-run transition speeds in ostriches measured using GPS-IMU sensors. *J Exp Biol.* 2016;219(20):3301-8. doi: 10.1242/jeb.142588. PubMed PMID: WOS:000386834800017.
17. Hoyt DF, Taylor CR. Gait and the Energetics of Locomotion in Horses. *Nature.* 1981;292(5820):239-40. doi: DOI 10.1038/292239a0. PubMed PMID: WOS:A1981LX62500030.
18. Schooley RL, Sharpe PB, VanHorne B. Can shrub cover increase predation risk for a desert rodent? *Can J Zool.* 1996;74(1):157-63. doi: DOI 10.1139/z96-020. PubMed PMID: WOS:A1996TY14800020.
19. Wynn ML, Clemente C, Nasir AF, Wilson RS. Running faster causes disaster: trade-offs between speed, manoeuvrability and motor control when running around corners in northern quolls (*Dasyurus hallucatus*). *J Exp Biol.* 2015;218(Pt 3):433-9. Epub 2015/02/06. doi: 10.1242/jeb.111682. PubMed PMID: 25653423.
20. Wilson AM, Hubel TY, Wilshin SD, Lowe JC, Lorenc M, Dewhirst OP, et al. Biomechanics of predator-prey arms race in lion, zebra, cheetah and impala. *Nature.* 2018;554(7691):183-8. Epub 2018/01/25. doi: 10.1038/nature25479. PubMed PMID: 29364874.
21. McNarry MA, Wilson RP, Holton MD, Griffiths IW, Mackintosh KA. Investigating the relationship between energy expenditure, walking speed and angle of turning in humans. *Plos One.* 2017;12(8). doi: ARTN e0182333  
10.1371/journal.pone.0182333. PubMed PMID: WOS:000407396200045.
22. Wilson R, Griffiths I, Legg P, Friswell M, Bidder O, Halsey L, et al. Turn costs change the value of animal search paths. *Ecology letters.* 2013;16(9):1145-50.
23. Bidder OR, Soresina M, Shepard EL, Halsey LG, Quintana F, Gomez-Laich A, et al. The need for speed: testing acceleration for estimating animal travel rates in terrestrial

- dead-reckoning systems. *Zoology*. 2012;115(1):58-64. doi: 10.1016/j.zool.2011.09.003. PubMed PMID: WOS:000301032400007.
24. Shepard ELC, Wilson RP, Rees WG, Grundy E, Lambertucci SA, Vosper SB. Energy Landscapes Shape Animal Movement Ecology. *Am Nat*. 2013;182(3):298-312. doi: 10.1086/671257. PubMed PMID: WOS:000322901300005.
  25. Halsey LG, White CR. A different angle: comparative analyses of whole-animal transport costs when running uphill. *J Exp Biol*. 2017;220(Pt 2):161-6. Epub 2016/11/02. doi: 10.1242/jeb.142927. PubMed PMID: 27802142.
  26. Walsh PD. Area-restricted search and the scale dependence of patch quality discrimination. *J Theor Biol*. 1996;183(4):351-61. doi: DOI 10.1006/jtbi.1996.0227. PubMed PMID: WOS:A1996VY98700001.
  27. Bau J, Carde RT. Modeling Optimal Strategies for Finding a Resource-Linked, Windborne Odor Plume: Theories, Robotics, and Biomimetic Lessons from Flying Insects. *Integr Comp Biol*. 2015;55(3):461-77. doi: 10.1093/icb/icv036. PubMed PMID: WOS:000360006000011.
  28. Hulbert IAR, French J. The accuracy of GPS for wildlife telemetry and habitat mapping. *J Appl Ecol*. 2001;38(4):869-78. doi: DOI 10.1046/j.1365-2664.2001.00624.x. PubMed PMID: WOS:000170568000016.
  29. Bidder OR, Walker JS, Jones MW, Holton MD, Urge P, Scantlebury DM, et al. Step by step: reconstruction of terrestrial animal movement paths by dead-reckoning. *Mov Ecol*. 2015;3(1):23. Epub 2015/09/19. doi: 10.1186/s40462-015-0055-4. PubMed PMID: 26380711; PubMed Central PMCID: PMC4572461.
  30. Granatosky MC, Bryce CM, Hanna J, Fitzsimons A, Laird MF, Stilson K, et al. Inter-stride variability triggers gait transitions in mammals and birds. *P Roy Soc B-Biol Sci*. 2018;285(1893). doi: ARTN 20181766 10.1098/rspb.2018.1766. PubMed PMID: WOS:000465428300005.
  31. Maloiy GMO, Rugangazi BM, Rowe MF. Energy expenditure during level locomotion in large desert ungulates: the one-humped camel and the domestic donkey. *J Zool*. 2009;277(3):248-55. doi: 10.1111/j.1469-7998.2008.00535.x. PubMed PMID: WOS:000263521400008.
  32. Nudds RL, Folkow LP, Lees JJ, Tickle PG, Stokkan KA, Codd JR. Evidence for energy savings from aerial running in the Svalbard rock ptarmigan (*Lagopus muta hyperborea*). *Proc Biol Sci*. 2011;278(1718):2654-61. Epub 2011/02/04. doi: 10.1098/rspb.2010.2742. PubMed PMID: 21288943; PubMed Central PMCID: PMC3136837.
  33. Watson RR, Rubenson J, Coder L, Hoyt DF, Propert MWG, Marsh RL. Gait-specific energetics contributes to economical walking and running in emus and ostriches. *P Roy Soc B-Biol Sci*. 2011;278(1714):2040-6. doi: 10.1098/rspb.2010.2022. PubMed PMID: WOS:000290956100018.
  34. Dawson TJ, Taylor CR. Energetic Cost of Locomotion in Kangaroos. *Nature*. 1973;246(5431):313-4. doi: DOI 10.1038/246313a0. PubMed PMID: WOS:A1973R392800043.
  35. Schick RS, Loarie SR, Colchero F, Best BD, Boustany A, Conde DA, et al. Understanding movement data and movement processes: current and emerging directions. *Ecology letters*. 2008;11(12):1338-50.
  36. Brody S. Bioenergetics and growth, with special reference to the efficiency complex in domestic animals. New York,: Reinhold; 1945. xii, 1023 p. p.

37. Wilson R, Shepard E, Liebsch N, Wilson R, Shepard E. Prying into the intimate details of animal lives: use of a daily diary on animals. *Endangered Species Research*. 2008;3.
38. Williams HJ, Holton MD, Shepard ELC, Largey N, Norman B, Ryan PG, et al. Identification of animal movement patterns using tri-axial magnetometry. *Mov Ecol*. 2017;5. doi: ARTN 6  
10.1186/s40462-017-0097-x. PubMed PMID: WOS:000397817700001.
39. Bidder OR, Qasem LA, Wilson RP. On higher ground: how well can dynamic body acceleration determine speed in variable terrain? *Plos One*. 2012;7(11):e50556. Epub 2012/12/12. doi: 10.1371/journal.pone.0050556. PubMed PMID: 23226313; PubMed Central PMCID: PMCPCMC3511514.
40. Qasem L, Cardew A, Wilson A, Griffiths I, Halsey LG, Shepard ELC, et al. Tri-Axial Dynamic Acceleration as a Proxy for Animal Energy Expenditure; Should We Be Summing Values or Calculating the Vector? *Plos One*. 2012;7(2). doi: ARTN e31187  
10.1371/journal.pone.0031187. PubMed PMID: WOS:000302853600123.

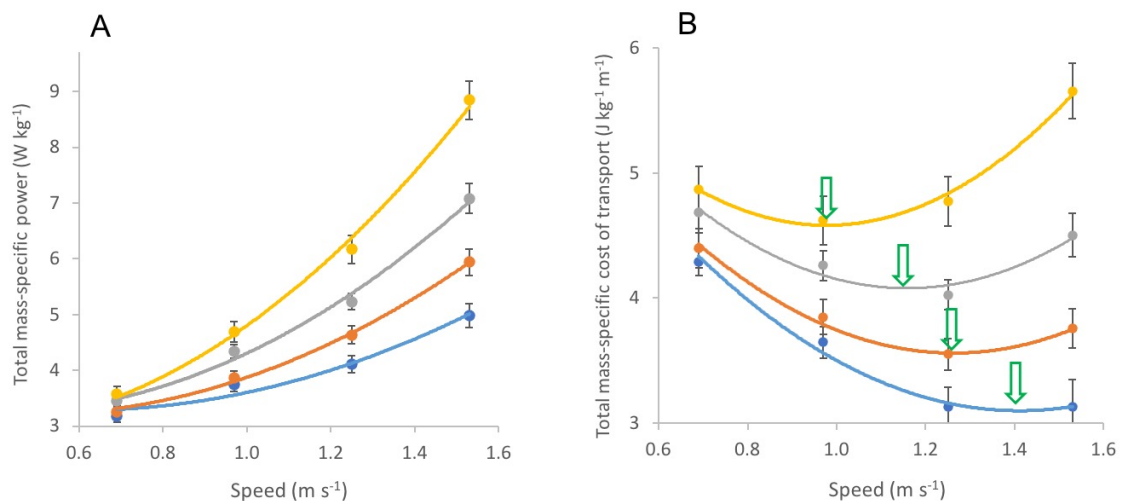

**Fig 1. Metabolic measurements versus average walking speed for 20 human participants walking tracks with turns of varied extent.** (A) Mean ( $\pm$  SE) total mass-specific power and (B) mean ( $\pm$  SE) total mass-specific cost of transport for straight movement (blue), 90° turns every 5 m (orange), 135° turns every 5 m (grey) and a 180° turns every 5 m (yellow). Quadratic curves were fitted using the coefficients of the outputs of linear mixed-effects models (see Table 1). Arrows show COT<sub>min</sub>.

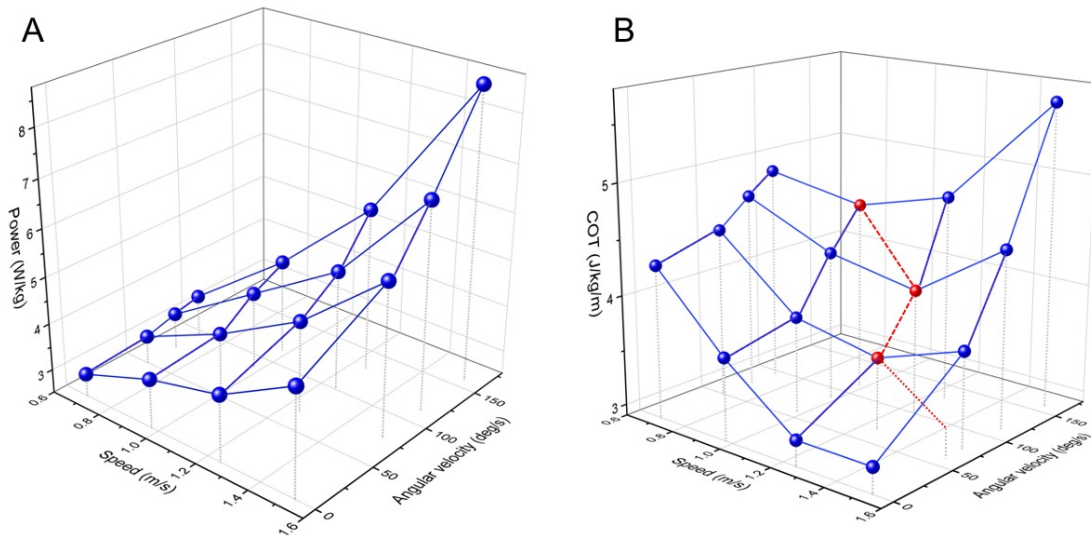

**Fig 2. 3D representations of how mass-specific metabolic power and the mass-specific cost of transport are influenced by average travel speed and angular velocity.** (A) Mass-specific power, and (B) mass-specific cost of transport (COT) for twenty male participants walking courses with defined angle turns interspaced with straight sections. Each point represents a mean value from twenty values, each of which is derived from a single participant. Power costs increase with both speed and angular velocity. Against this, the accelerating power costs of higher angular velocities produce cost of transit minima (highlighted in red) where any turning occurs and these minima occur at lower speeds with higher angular velocities.

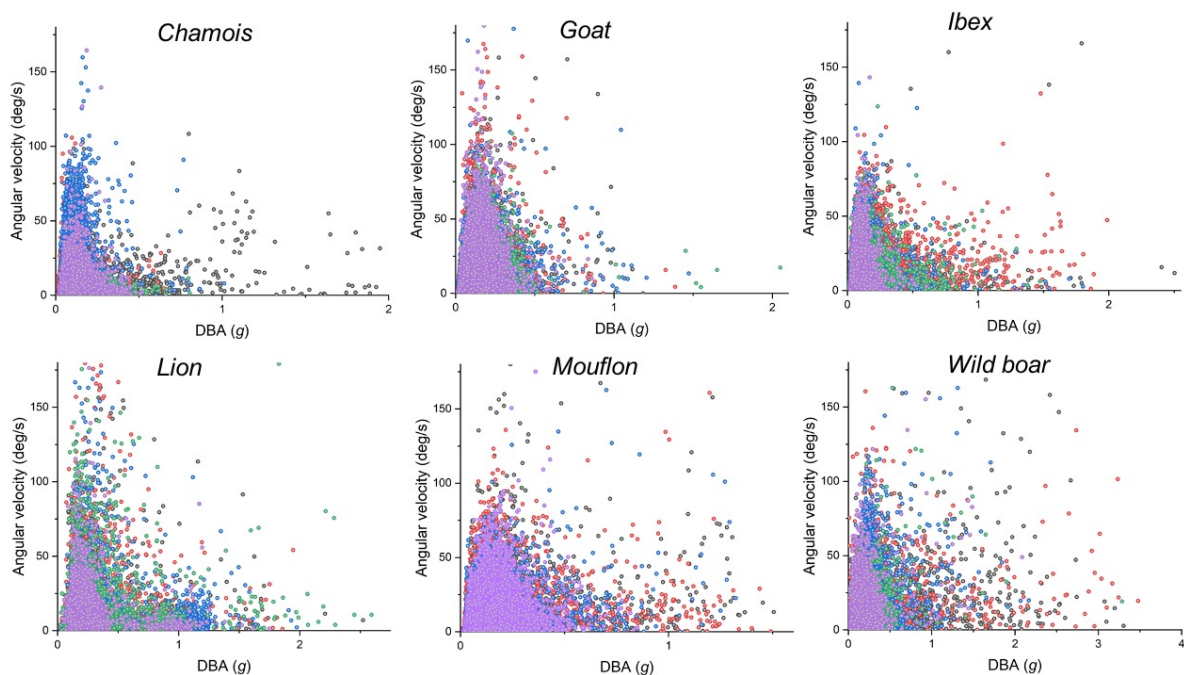

**Fig 3. Incidence of angular velocity against dynamic body acceleration (DBA) – a linear proxy for travel speed – in 6 free-living terrestrial species.** The lion data show both DBA [black numbering on x-axis] and speed [red numbering] because these animals were equipped with high resolution GPS – see inset). Each point shows a value taken at *ca.* 10 s intervals over a length of time that corresponds to about 20,000 points for each individual (N = 5 per species except for the mouflon where N = 4, with individuals depicted by different colors). Note how all distributions show decreasing angular velocities with increasing speed across all speed ranges, starting with the slowest.

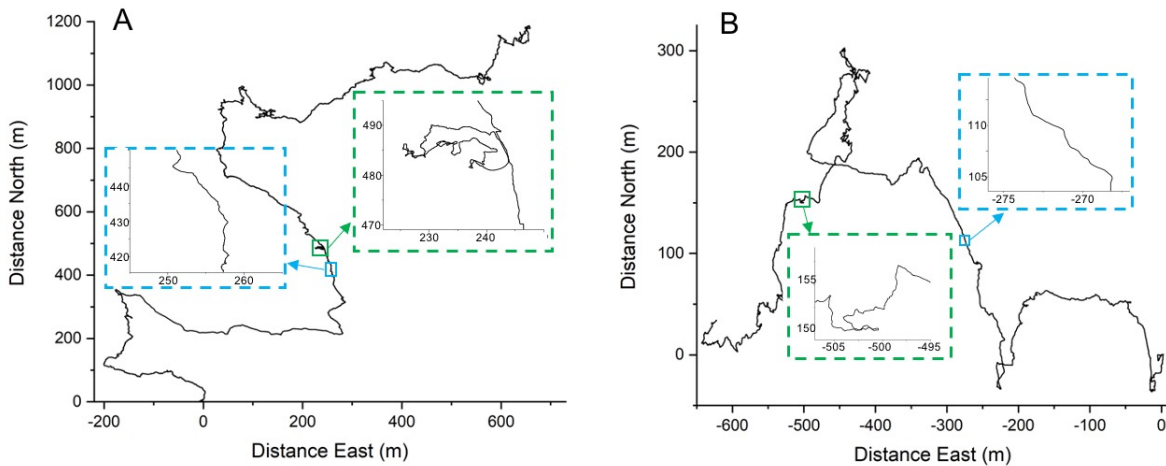

**Fig 4. Examples of 20 h movement paths (at 4 Hz and elucidated by dead-reckoning) of two of the study animals.** (A) a chamois and (B) an Ibex, showing in the insets the scale over which turns are made (cf. our  $VO_2$  study on humans). Note how even apparently straight-line paths (blue boxes) show clear turns, although angles are obtuse, while tortuous sections (green boxes) show both obtuse and acute turns.
